# Supplementary material
Source: publisher figshare collection journal article supplement (https://tandf.figshare.com/articles/dataset/_/6886565)
Supplement: Supplementary file 1 [file 2]

Figure S1

A

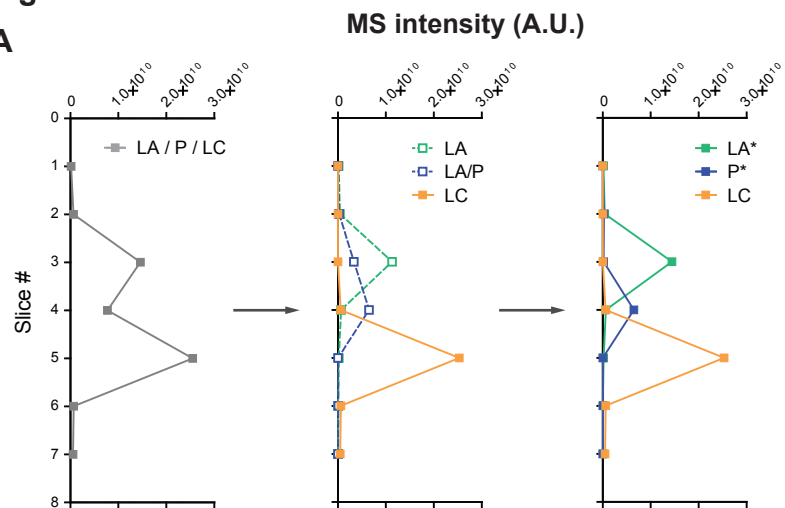

B

Peptide signal-to-noise ratio  
= 1 / (Coeff. of Variation)

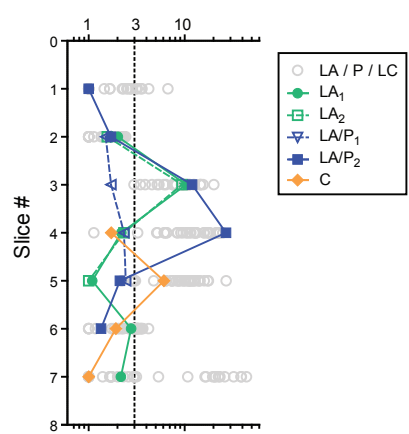

C

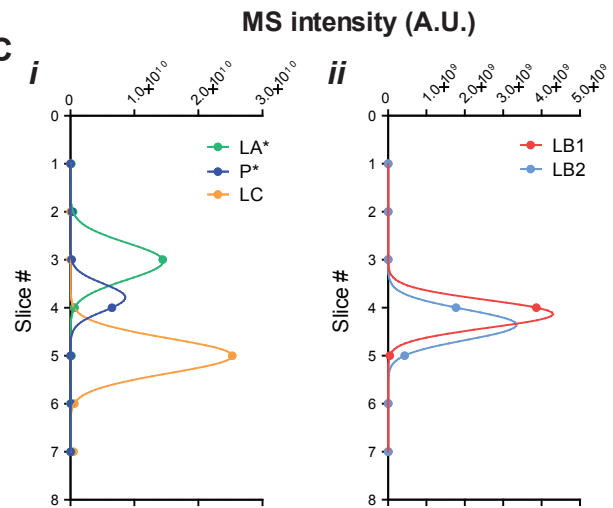

D

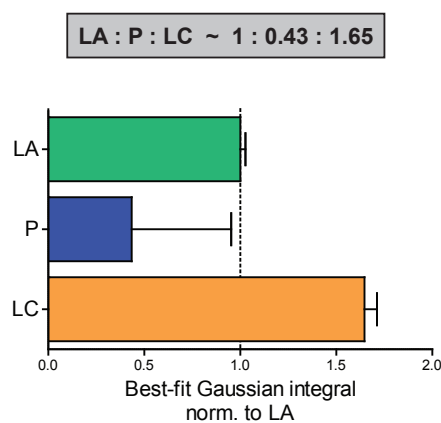

E

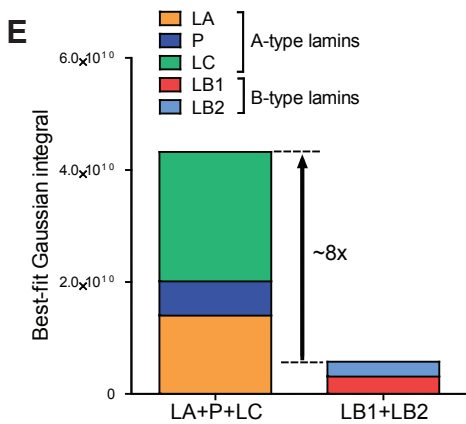

**Figure S2**

**A**

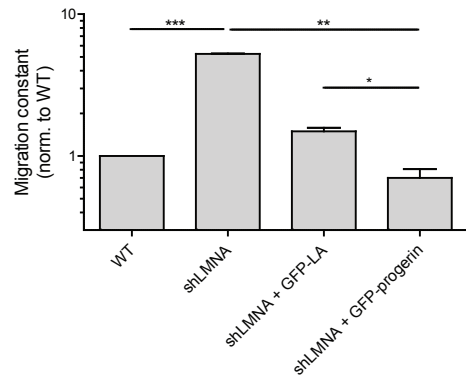

**B**

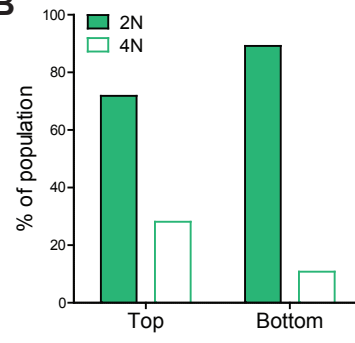

Figure S3

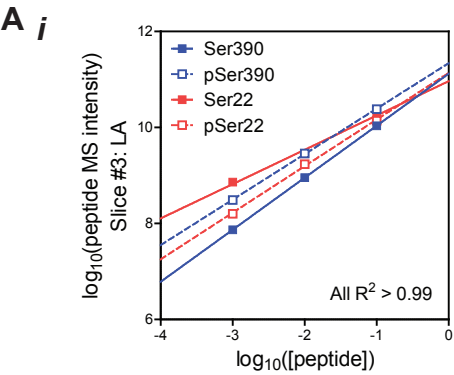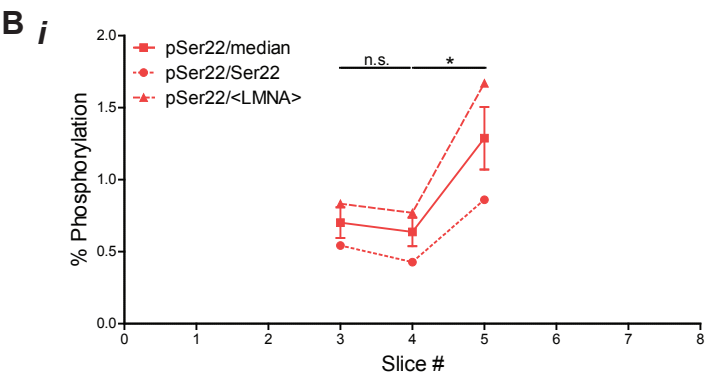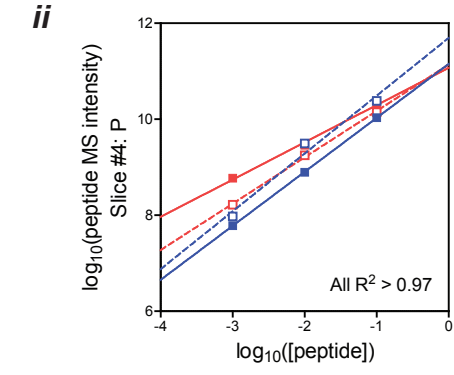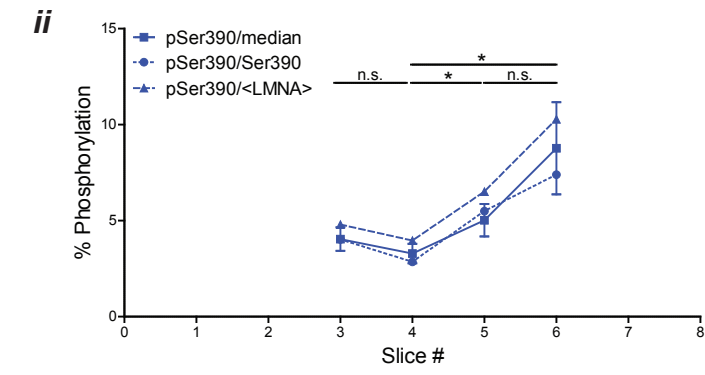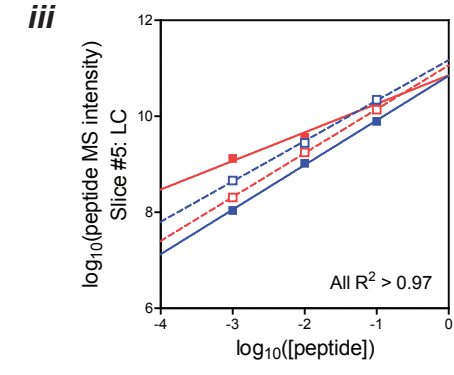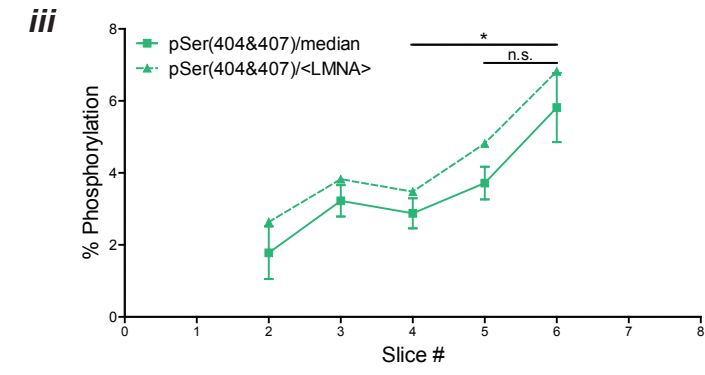

Figure S4

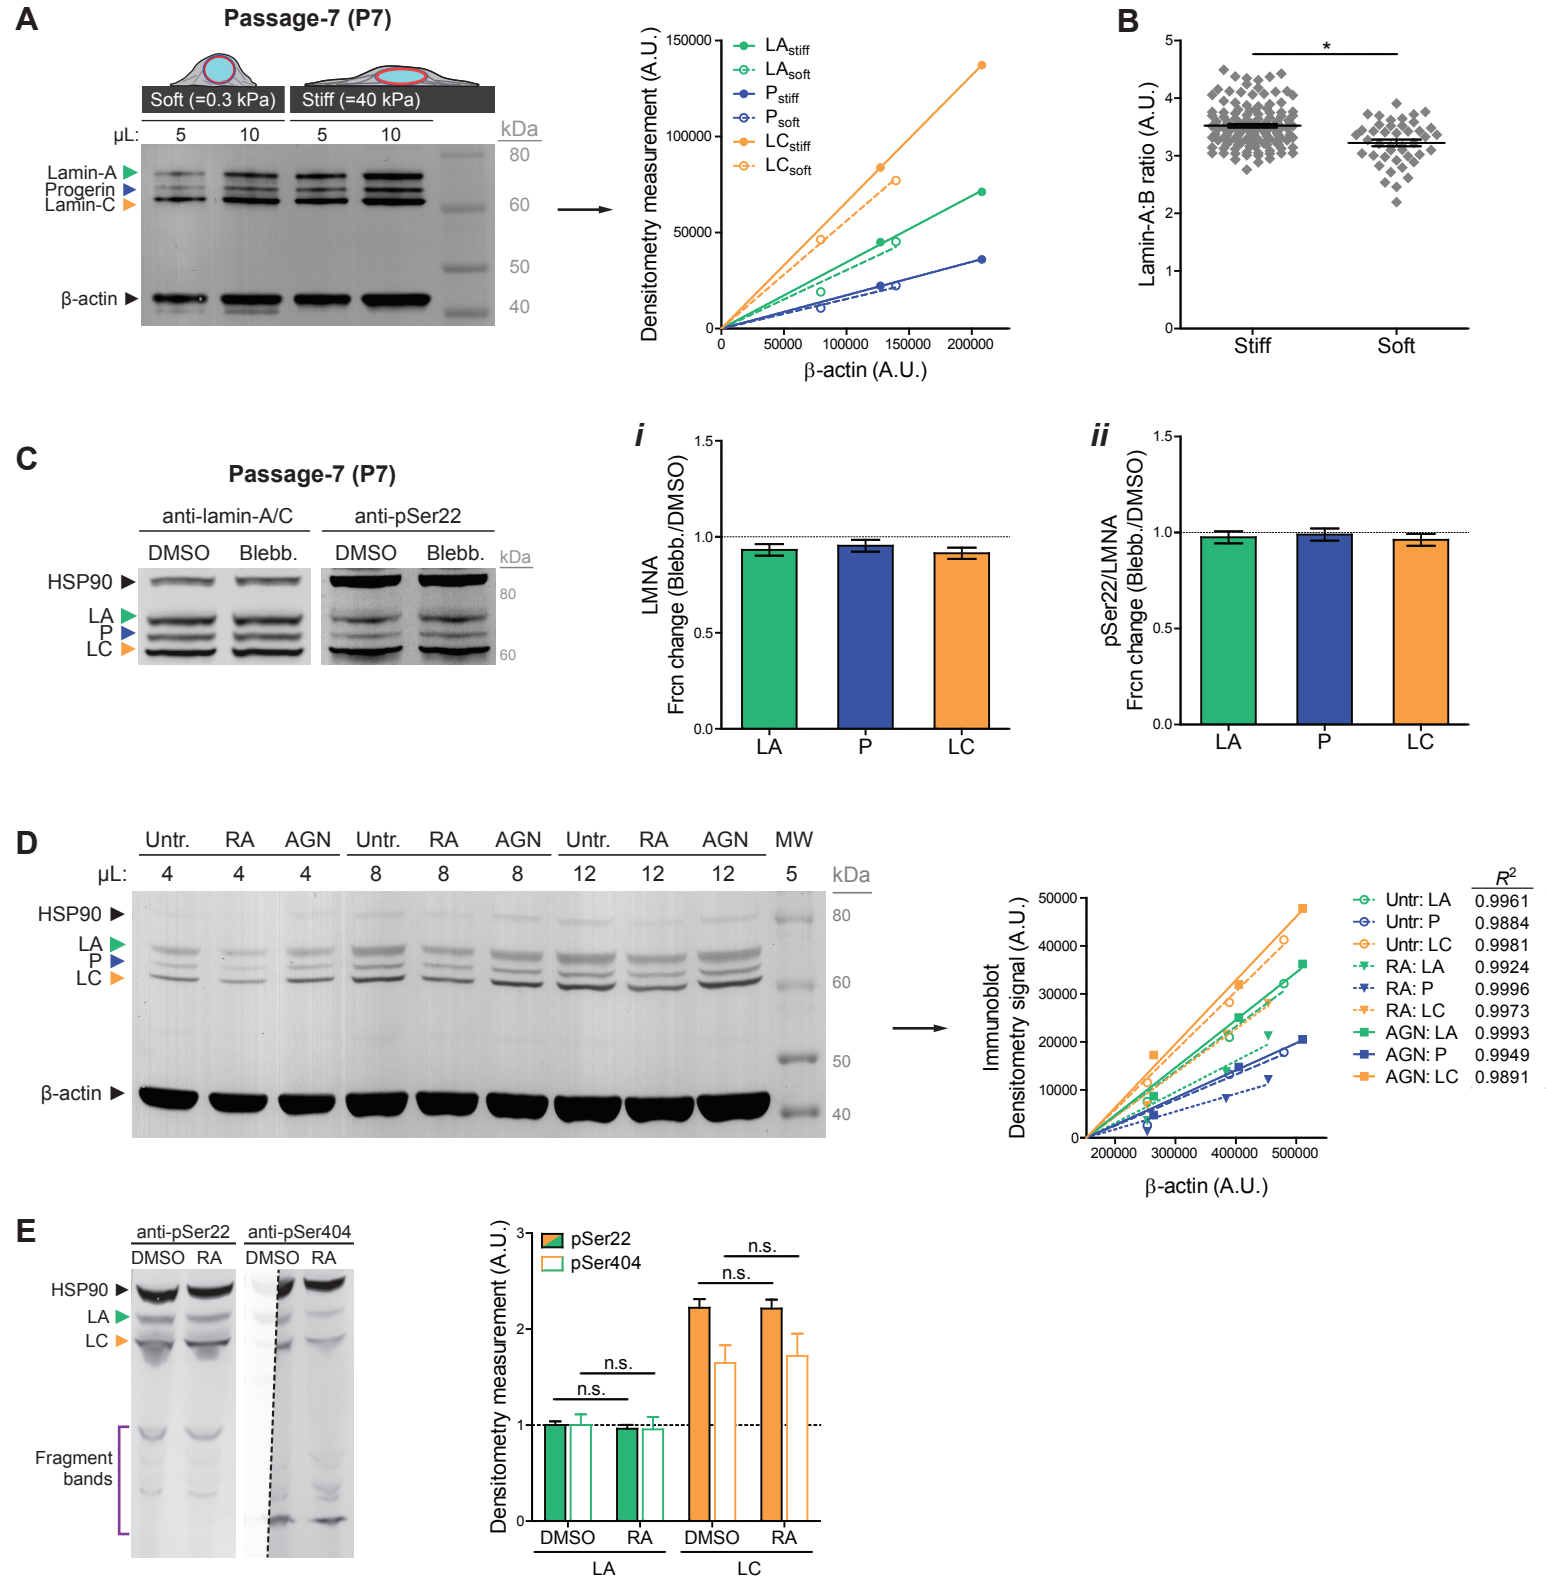

Table S1

| # samples detecting phospho-peptide |                  |    |   |    | # samples detecting non-phospho ctl |   |    | Detectability (%) |     |     |
|-------------------------------------|------------------|----|---|----|-------------------------------------|---|----|-------------------|-----|-----|
| LMNA                                | Peptide sequence | LA | P | LC | LA                                  | P | LC | LA                | P   | LC  |
| pSer18                              | SGAQASSTPLSPTR   | 0  | 1 | 1  | 4                                   | 4 | 4  | 0                 | 25  | 25  |
| pSer19                              | SGAQASSTPLSPTR   | 2  | 1 | 1  | 4                                   | 4 | 4  | 50                | 25  | 25  |
| pSer22                              | SGAQASSTPLSPTR   | 1  | 1 | 1  | 4                                   | 4 | 4  | 25                | 25  | 25  |
| pSer390                             | LRLSPSPTSQR      | 1  | 1 | 2  | 4                                   | 4 | 4  | 25                | 25  | 50  |
| pSer404,407                         | ASSHSSQTQGGGSVTK | 4  | 4 | 4  | 0                                   | 0 | 0  | 100               | 100 | 100 |

| LMNB1   | Peptide sequence | LB1 | LB1 | LB1 |
|---------|------------------|-----|-----|-----|
| pSer23  | AGGPTTPLSPTR     | 0   | 4   | 0   |
| pSer391 | LSPSPSSR         | 0   | 4   | 0   |
| pSer393 | LSPSPSSR         | 0   | 4   | 0   |

| LMNB2   | Peptide sequence | LB2 | LB2 | LB2 |
|---------|------------------|-----|-----|-----|
| pSer37  | AGGPATPLSPTR     | 0   | 4   | 0   |
| pSer405 | LSPSPSSR         | 0   | 4   | 0   |
| pSer407 | LSPSPSSR         | 0   | 4   | 0   |
